# Supplementary material for: Source matters: a survey of cost variation for fecal immunochemical tests in primary care
Source: Springer Nature journal article supplement (doi:10.1186/s12913-022-07576-4), 2022-02-15
Supplement: MOESM1 [file 20135058]

## Appendix 1. Readiness Survey

### Understanding Practice Readiness to Increase Colorectal Cancer Screening via Direct Mail Programs

Thank you for completing this ORPRN survey to better understand the reasons a practice may choose to change the way care is delivered.

- We focus on using direct mail programs to improve screening for colorectal cancer as a test case.
- We are interested in the views from practices that **have**, and **have not**, used direct mail programs.
- **This survey takes 8-15 minutes to complete and is broken into 5 sections.**
- This survey should be completed by a **leader in the practice** who has good insights into the clinical operations and changes underway, such as a medical director, office manager, or quality improvement specialist.

**You may complete the survey electronically – or return hard copies by mail, fax, or email to:**

**Oregon Rural Practice-based Research Network  
Oregon Health & Science University  
3181 S.W. Sam Jackson Park Road, Mail Code: L222  
Portland, OR 97239-3098**

**Fax | Email**

If you have questions about the survey, or direct mail programs, please contact us at:

- Name, Project Manager | email
- Name, Principal Investigator | email
- Name, Research Assistant | email

The following information is provided for your reference:

- Annual testing using **Fecal Immunochemical Tests (FIT)** or high sensitivity **Fecal Occult Blood Tests (FOBT)** can help prevent and reduce **colorectal cancer (CRC)** in average risk patients aged 50-75.
- **Direct mail programs** are an evidence-based intervention where a FIT/FOBT is sent in the mail to the home of patients who are due for CRC screening. Direct mail programs can increase CRC screening by 6-40% depending on the associated materials, reminders, and population served.
- Some practices are partnering with labs, payers, or larger health systems to support their use of direct mail programs.

A fully operational direct mail program requires practices to:

- Choose to implement the program
- Identify a practice champion and improvement team
- Select and identify a FIT/FOBT for use in CRC screening
- Develop a process for identifying patients that are due for CRC screening
- Coordinate distribution of FIT/FOBT kits and associated materials to eligible patients
- Implement reminders to encourage test completion
- Reconcile laboratory test results
- Support patient follow-up to colonoscopy on abnormal screens
- Monitor and review CRC screening data to inform continued improvement

**SECTION 1: BASICS**

- 1) Practice Name: \_\_\_\_\_
- 2) Practice Address: \_\_\_\_\_
- 3) Approximately how many research projects or quality improvement initiatives has your practice worked on in the last 12 months? \_\_\_\_\_
- 4) Approximately how many of the research projects or quality improvement initiatives reported in #3 above, were related to CRC screening? \_\_\_\_\_
- 5) What is the preferred modality for CRC screening at your practice?
  - a. Colonoscopy
  - b. FIT/FOBT
  - c. Both a and b
  - d. Other, please specify: \_\_\_\_\_
- 6) On a scale from 1 to 10 where one is hate it to 10 is love it, how do your clinicians generally feel about using FIT/FOBT for colorectal cancer screening? Circle one:

|                                 |   |   |   |   |   |   |   |   |    |
|---------------------------------|---|---|---|---|---|---|---|---|----|
| 1                               | 2 | 3 | 4 | 5 | 6 | 7 | 8 | 9 | 10 |
| Hate FIT/FOBT.....Love FIT/FOBT |   |   |   |   |   |   |   |   |    |

Details?

- 7) On a scale from 1 to 10 where one is no priority at all and 10 is the highest priority, what is the priority that your practice’s leadership places on improving CRC screening in the year ahead?

|                                  |   |   |   |   |   |   |   |   |    |
|----------------------------------|---|---|---|---|---|---|---|---|----|
| 1                                | 2 | 3 | 4 | 5 | 6 | 7 | 8 | 9 | 10 |
| No priority.....highest priority |   |   |   |   |   |   |   |   |    |

- 8) What is your clinic’s current up-to-date rate for CRC screening in age eligible members (50-75)?
  - a. Rate: \_\_\_\_\_
  - b. How determined, please specify (e.g., electronic health record, best guess):  
\_\_\_\_\_

## SECTION 2: FIT/FOBT USE & COSTS

**Work by our team suggests that FIT/FOBT costs vary widely across practices. We are trying to understand why costs vary, and how practices might use this information to negotiate/deliver high quality care. Please help us by answer the following questions:**

- 9) What FIT/FOBT is your practice currently using? [check all that apply]
- a. OC Auto-FIT (Polymedco)
  - b. OC-Light iFOBT Test (Polymedco)
  - c. QuickVue iFOBT (Quidel)
  - d. Hemosure One-Step iFOBT test (Hemosure, Inc)
  - e. Insure FIT (Clinical Genomics)
  - f. Hemmocult-ICT (Beckman Coulter)
  - g. I don't know
  - h. Other, please specify: \_\_\_\_\_
- 10) Where do you get your FIT/FOBT kits from?
- a. Laboratory
  - b. Vendor
  - c. Health System
  - d. Other, please specify: \_\_\_\_\_
- 11) Do you know how much a FIT/FOBT kit costs your practice?
- a. No
  - b. Yes, how much? \_\_\_\_\_
- 12) Do you know how much an uninsured patient at your practice is charged for completing a FIT/FOBT kit?
- a. No
  - b. Yes, how much? \_\_\_\_\_

## SECTION 3: DIRECT MAIL PROGRAM USE

- 13) When does your practice plan to begin using a direct mail program to increase CRC screening?
- a. We are not planning to use a direct mail program
  - b. We are planning to use a direct mail program starting in (specify year): \_\_\_\_\_
  - c. We are currently using a direct mail program (specify year started): \_\_\_\_\_
- 14) Did your practice work with any organizations/partners (e.g., American Cancer Society, your Coordinated Care Organization, a research team) to implement the direct mail program?
- a. Not applicable
  - b. No
  - c. Yes, specify who and how you work(ed) together:

15) On a scale from 1 (not at all) to 5 (fully), to what extent has your practice taken the following steps to use a direct mail program to increase CRC screening?

|                                                                                        | Not at all | Considering | Started | Refining | Fully |
|----------------------------------------------------------------------------------------|------------|-------------|---------|----------|-------|
| a. Chosen to implement a direct mail program                                           | 1          | 2           | 3       | 4        | 5     |
| b. Identified a practice champion and improvement team                                 | 1          | 2           | 3       | 4        | 5     |
| c. Developed a process to identify patients due for CRC screening                      | 1          | 2           | 3       | 4        | 5     |
| d. Coordinated distribution of FIT/FOBT kits to patients                               | 1          | 2           | 3       | 4        | 5     |
| e. Implemented reminders to encourage test completion                                  | 1          | 2           | 3       | 4        | 5     |
| f. Developed a process to reconcile lab results                                        | 1          | 2           | 3       | 4        | 5     |
| g. Developed a process to support patient follow-up to colonoscopy on abnormal screens | 1          | 2           | 3       | 4        | 5     |
| h. Monitored and reviewed CRC screening data to inform continued improvement           | 1          | 2           | 3       | 4        | 5     |

***For questions 16 and 17, please think back to the time when your practice was considering using a direct mail program to increase CRC screening. That may be where your practice is currently at, or it may be some time ago.***

16) Our practice is ready to implement the changes needed for a direct mail program to increase CRC screening (circle one):

|          |                   |         |                |       |
|----------|-------------------|---------|----------------|-------|
| Disagree | Somewhat Disagree | Neutral | Somewhat Agree | Agree |
|----------|-------------------|---------|----------------|-------|

17) Please circle the response that best reflects your practice's readiness to implement a direct mail program. [Note: Some items may feel repetitive – we apologize. Our goal is to see if a single item can replace this existing multi-item instrument. Please help by completing all questions!]

|                                                                         | Disagree | Somewhat Disagree | Neither Agree nor Disagree | Somewhat Agree | Agree |
|-------------------------------------------------------------------------|----------|-------------------|----------------------------|----------------|-------|
| a. We are committed to implementing a direct mail program.              | 1        | 2                 | 3                          | 4              | 5     |
| b. We can keep track of progress in implementing a direct mail program. | 1        | 2                 | 3                          | 4              | 5     |
| c. We will do whatever it takes to implement a direct mail program.     | 1        | 2                 | 3                          | 4              | 5     |

17) CONTINUED...Please circle the response that best reflects your practice's readiness to implement a direct mail program. [Note: Some items may feel repetitive – we apologize. Our goal is to see if a single item can replace this existing multi-item instrument. Please help by completing all questions!]

|                                                                                           | Disagree | Somewhat Disagree | Neither Agree nor Disagree | Somewhat Agree | Agree |
|-------------------------------------------------------------------------------------------|----------|-------------------|----------------------------|----------------|-------|
| d. We can support providers as they adjust to a direct mail program.                      | 1        | 2                 | 3                          | 4              | 5     |
| e. We want to implement a direct mail program.                                            | 1        | 2                 | 3                          | 4              | 5     |
| f. We can handle the challenges that might arise in implementing a direct mail program.   | 1        | 2                 | 3                          | 4              | 5     |
| g. We are determined to implement a direct mail program.                                  | 1        | 2                 | 3                          | 4              | 5     |
| h. We can coordinate tasks so that implementation of a direct mail program goes smoothly. | 1        | 2                 | 3                          | 4              | 5     |
| i. We are motivated to implement a direct mail program.                                   | 1        | 2                 | 3                          | 4              | 5     |
| j. We can manage the politics of implementing a direct mail program.                      | 1        | 2                 | 3                          | 4              | 5     |

#### SECTION 4: PRACTICE CHARACTERISTICS

18) Please provide the number of clinicians (MD, DO, NP, PA) and their combined full-time equivalent (FTE):

- a. Number clinicians: \_\_\_\_\_
- b. Combined clinician FTE: \_\_\_\_\_

19) Please estimate the total number of patient visits over a typical week at your practice: \_\_\_\_\_

20) Please estimate the percentage of your practice's current patient panel that is male: \_\_\_\_\_%

21) Please estimate the percentage of your practice's current patient panel that is Hispanic or Latino: \_\_\_\_\_%

22) Please estimate the percentage of your practices revenue from patient care that comes from:

- Commercial Insurance: \_\_\_\_\_%
- Medicaid/CHIP/OHP: \_\_\_\_\_%
- Medicare: \_\_\_\_\_%
- Other: \_\_\_\_\_%

23) If we have clarifying questions about your responses on this survey, what is your name and the best way we can reach you?

- a. Name: \_\_\_\_\_
- b. Phone: \_\_\_\_\_
- c. Email: \_\_\_\_\_
- d. What is your role in the practice: \_\_\_\_\_

**SECTION 5: FINAL QUESTIONS (YOU'RE ALMOST DONE!)**

24) To what extent has your practice used any of the following activities to increase CRC screening in the last 12 months?

|                                                                                                                                                                                |       |           |           |        |
|--------------------------------------------------------------------------------------------------------------------------------------------------------------------------------|-------|-----------|-----------|--------|
| a. Written reminders (letter, postcard, email) to tell patients they are due for screening                                                                                     | Never | Sometimes | Routinely | Unsure |
| b. Used telephone messages (automated, live) or text to tell patients they are due for screening                                                                               | Never | Sometimes | Routinely | Unsure |
| c. Provided patient incentives (small rewards through cash or coupons) aimed to motivate patients to get screened or to encourage others (e.g., family members, close friends) | Never | Sometimes | Routinely | Unsure |
| d. Provided printed materials (e.g., letters, brochures, newsletters) or videos to inform and motivate patients to get screened – aka “small media”                            | Never | Sometimes | Routinely | Unsure |
| e. Used supportive staff (e.g., lay health advisors, clinical staff) to inform individuals about the need and benefits of screening, and helping overcome barriers.            | Never | Sometimes | Routinely | Unsure |
| f. Presented clinicians/staff with information about their performance in providing screening                                                                                  | Never | Sometimes | Routinely | Unsure |
| g. Provided direct or indirect rewards (monetary or otherwise) to motivate providers to screen patients.                                                                       | Never | Sometimes | Routinely | Unsure |
| h. Let clinicians/staff know a patient is due or overdue for CRC screening (reminder)                                                                                          | Never | Sometimes | Routinely | Unsure |
| i. Reduced patient’s out-of-pocket costs for CRC screening (e.g., vouchers, changes to co-pay)                                                                                 | Never | Sometimes | Routinely | Unsure |
| j. Reduced administrative barriers (e.g., patient can request FIT or get it by mail)                                                                                           | Never | Sometimes | Routinely | Unsure |

25) Please indicate the extent to which you agree or disagree that your practice has used the following strategies to improve colorectal cancer (CRC) screening:

|                                                                                                                                         |                   |                   |                           |                |                |     |
|-----------------------------------------------------------------------------------------------------------------------------------------|-------------------|-------------------|---------------------------|----------------|----------------|-----|
| a. Providing information and skills-training                                                                                            | Strongly Disagree | Somewhat Disagree | Neither Agree or Disagree | Somewhat Agree | Strongly Agree | N/A |
| b. Using opinion leaders, role modeling, or other vehicles to encourage support for changes                                             | Strongly Disagree | Somewhat Disagree | Neither Agree or Disagree | Somewhat Agree | Strongly Agree | N/A |
| c. Changing or creating systems in the practice that make it easier to provide high quality care                                        | Strongly Disagree | Somewhat Disagree | Neither Agree or Disagree | Somewhat Agree | Strongly Agree | N/A |
| d. Removing or reducing barriers to better quality of care                                                                              | Strongly Disagree | Somewhat Disagree | Neither Agree or Disagree | Somewhat Agree | Strongly Agree | N/A |
| e. Using teams focused on accomplishing the change process for improved care                                                            | Strongly Disagree | Somewhat Disagree | Neither Agree or Disagree | Somewhat Agree | Strongly Agree | N/A |
| f. Delegating to non-clinician staff the responsibility to carry out aspects of care that are normally the responsibility of physicians | Strongly Disagree | Somewhat Disagree | Neither Agree or Disagree | Somewhat Agree | Strongly Agree | N/A |
| g. Providing to those who are charged with implementing improved care the power to authorize and make the desired changes               | Strongly Disagree | Somewhat Disagree | Neither Agree or Disagree | Somewhat Agree | Strongly Agree | N/A |
| h. Periodic measurement of care quality for assessing compliance with any new approach to care                                          | Strongly Disagree | Somewhat Disagree | Neither Agree or Disagree | Somewhat Agree | Strongly Agree | N/A |



26) [Last question!] Please indicate the extent to which you agree or disagree that your practice has used the following strategies to improve colorectal cancer (CRC) screening:

|                                                                                                                                                       |                   |                   |                           |                |                |     |
|-------------------------------------------------------------------------------------------------------------------------------------------------------|-------------------|-------------------|---------------------------|----------------|----------------|-----|
| a. Reporting measurements of practice performance on CRC screening for comparison with their peers                                                    | Strongly Disagree | Somewhat Disagree | Neither Agree or Disagree | Somewhat Agree | Strongly Agree | N/A |
| b. Setting goals and benchmarking rates of performance quality on CRC screening at least yearly                                                       | Strongly Disagree | Somewhat Disagree | Neither Agree or Disagree | Somewhat Agree | Strongly Agree | N/A |
| c. Customizing implementation of CRC screening care changes to the practice                                                                           | Strongly Disagree | Somewhat Disagree | Neither Agree or Disagree | Somewhat Agree | Strongly Agree | N/A |
| d. Using rapid cycling, piloting, pre-testing, or other vehicles for reducing the risk of negative results for introducing organizational-wide change | Strongly Disagree | Somewhat Disagree | Neither Agree or Disagree | Somewhat Agree | Strongly Agree | N/A |
| e. Deliberately designing care improvements so as to make clinician participation less work than before                                               | Strongly Disagree | Somewhat Disagree | Neither Agree or Disagree | Somewhat Agree | Strongly Agree | N/A |
| f. Deliberately designing care improvements to make the care process more beneficial to the patient                                                   | Strongly Disagree | Somewhat Disagree | Neither Agree or Disagree | Somewhat Agree | Strongly Agree | N/A |

*Thank you for your time and participation! This information will be used to refine interventions to improve CRC screening and treatment.*

For more information on FIT/FOBT options or help selecting a FIT, please see the [ACS Issue Brief, Finding the Right FIT](#) or contact us directly.
